# Supplementary material
Source: PubMed Central journal article supplement (PMC3174641)
Supplement: 1019612108_pnas.201019612SI.pdf [file 1019612108_pnas.201019612SI.pdf]

# Supporting Information

Hosokawa et al. 10.1073/pnas.1019612108

## SI Materials and Methods

**Bacterial Strains.** *Synechococcus elongatus* PCC 7942 and its derivatives used in this study are listed in Table S1. NUC42 (WT; ref. 1), NUC43 (*kaiABC*-null; ref. 1), IILC357 (*rpoD5*-null), ILC48 (*digA::flag*), ILC56 (*hspA::flag*), *kaiC*<sup>S157P</sup> (ref. 2.), and ILC504 (*rpoD5*-null;*kaiC*<sup>S157P</sup>) were used, each containing a bacterial luciferase reporter gene set, *luxAB*, fused to the *kaiBC* promoter (*P<sub>kaiBC</sub>::luxAB*), with the chloramphenicol-resistance gene at Neutral Site I in the genome. ILC357 was generated by the transformation of NUC42 with plasmid pIL470 carrying the downstream and upstream sequences of the *rpoD5* gene, with a kanamycin-resistance gene (*km<sup>r</sup>*) in the pGEM-T Easy Vector (Promega) background, to substitute each  $\sigma$  factor gene with *km<sup>r</sup>*. The complete segregation of the null mutant strains was confirmed by Southern blotting and PCR analyses. The loss of each  $\sigma$  factor mRNA was confirmed by Northern blotting analysis. The FLAG epitope-tagged strains ILC48 and ILC56 were generated by the insertion of the FLAG-encoding sequence (5'-GACTA-CAAGGACGATGACGACAAG-3') at the 3' terminus of the ORFs of *digA* and *hspA*, respectively (for the induction of the C-terminal FLAG-tagged protein) and *km<sup>r</sup>*. ILC504 was generated by the transformation of *kaiC*<sup>S157P</sup> with pIL470.

**DNA Microarray Analysis.** Total RNA was subjected to microarray analysis using an Affymetrix GeneChip designed on the basis of the *Synechococcus* genome, and the resulting raw signals (deposited in the NCBI GEO database GSE22468) were divided according to their genomic DNA-normalized values, as described previously (3). For each series of the time course experiment, the expression level  $x$  of gene  $g$  in strain  $s$  at  $t$  h after transfer to dark conditions in the  $n$ th experiment was then further normalized as:

$$x(g, s, t, n) = x(g, s, t, n) / Z(s, n),$$

where  $x$  represents the genomic DNA-normalized expression of gene  $g$  in strain  $s \in \{WT, kaiABCnull\}$  at  $t$  h after transfer to dark conditions by the procedure described above,  $n \in \{1, 2\}$ , and a normalization factor  $Z(s, n)$  was used so that the total RNA signal at hour 12 in the light ( $t = 0$ ) was deemed to be 1,000, as follows:

$$Z(s, n) = \sum_g (\gamma(g, s, 0, n)) / 1000.$$

The values for the RNA signals given hereafter are these normalized values. The procedure for the normalization of the time course data is shown schematically in Fig. S6.

**Identifying Dark-Induced Genes.** We identified the expression profiles of the WT and *kaiABC*-null strains that were significantly induced under the dark conditions from among 2,515 *Synecho-*

*coccus* ORFs. “Dark-induced” genes are defined in this study as those genes that are expressed more abundantly in the WT or *kaiABC*-null strains at at least one time point under the dark conditions than at hour 12 in the light (= dark onset). We statistically tested whether there is at least one point in which the average of  $x(g, s, 0, 1)$  and  $x(g, s, 0, 2)$  is higher than the average of  $x(g, s, t, 1)$  and  $x(g, s, t, 2)$ , using the MulCom test, a modified Dunnett’s multiple comparison test (4). The two parameters in MulCom test,  $m$  and  $t$ , were determined by *mulOpt* function in the Bioconductor package (version 1.2.0), so that the optimal combination of  $m$  and  $t$  was chosen to obtain the maximum number of differentially induced genes satisfying a false discovery rate threshold of  $<0.005$ . The parameters and  $t$  value of the modified Dunnett’s test are described in Dataset S1. In this way, 198 “dark-induced” genes were extracted. Note that the transition of the index for dark induction is continuous between the dark-induced and noninduced genes, and there is no clear cutoff point that distinguishes the two groups. Therefore, different thresholds can increase or reduce the number in each group.

**Evaluating the *kai* Dependence of Dark Induction.** We next identified the genes regulated by *kai* genes from these 198 dark-induced genes by comparing their expression profiles in the WT and *kaiABC*-null strains. Two values were used to evaluate *kai* dependence: the correlation between the time courses of the two strains (hereafter, *Cor*), and the statistical difference between the temporal averages of the two expression profiles (hereafter, *Avg-Pval*). The former value reflects the waveform of the expression profile, and the latter value evaluates the difference in the absolute expression levels. We defined *Cor* for gene  $g$ , as follows:

$$Cor = \frac{1}{4} \sum_{ij \in \{1, 2\}} Correlation(x(g, WT, i), x(g, kaiABCnull, j)),$$

where  $x(g, s, n) = [x(g, s, 0.5, n), x(g, s, 1, n), x(g, s, 2, n) \dots x(g, s, 12, n)]$  and “*Correlation*” represents Pearson’s correlation function.

*Avg-Pval* was defined as the  $P$  value calculated with a  $t$  test when the control groups, including *Average*( $x(g, WT, 1)$ ) and *Average*( $x(g, WT, 2)$ ), were compared with the sample groups, including *Average*( $x(g, kaiABCnull, 1)$ ) and *Average*( $x(g, kaiABCnull, 2)$ ). If the expression profiles of a gene satisfied *Cor* of  $>0.754$  (corresponding to the upper-limit value for the decorrelation test;  $P < 0.05$ ) and *Avg-Pval* of greater than the threshold 0.05, we defined it as *kai*-independent; if not, we regarded it as *kai*-dependent. Each value of *Cor* or *Avg-Pval* for the 198 dark-induced genes is shown in Dataset S1. Thus, 167 genes were categorized as “*kai*-dependent” dark-induced genes with this method. Again, the transition of the index used to estimate *kai* dependence was continuous between the *kai*-dependent and *kai*-independent genes. Therefore, different threshold values can increase or reduce the number of *kai*-dependent genes.

1. Nishimura H, et al. (2002) Mutations in KaiA, a clock protein, extend the period of circadian rhythm in the cyanobacterium *Synechococcus elongatus* PCC 7942. *Microbiology* 148:2903–2909.
2. Nakajima M, et al. (2005) Reconstitution of circadian oscillation of cyanobacterial KaiC phosphorylation in vitro. *Science* 308:414–415.

3. Ito H, et al. (2009) Cyanobacterial daily life with Kai-based circadian and diurnal genome-wide transcriptional control in *Synechococcus elongatus*. *Proc Natl Acad Sci USA* 106:14168–14173.
4. Isalla, C (2011) Mulcom. Available at <http://www.bioconductor.org/packages/2.8/bioc/html/Mulcom.html>. Accessed May 26, 2011.

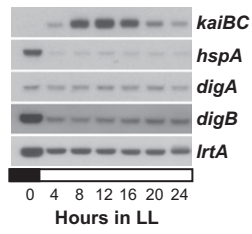

**Fig. S1.** Expression of dark-induced genes under continuous light (LL). Expression profiles of *kaiBC* and four dark-induced genes under LL conditions after two 12 h/12 h light/dark cycles.

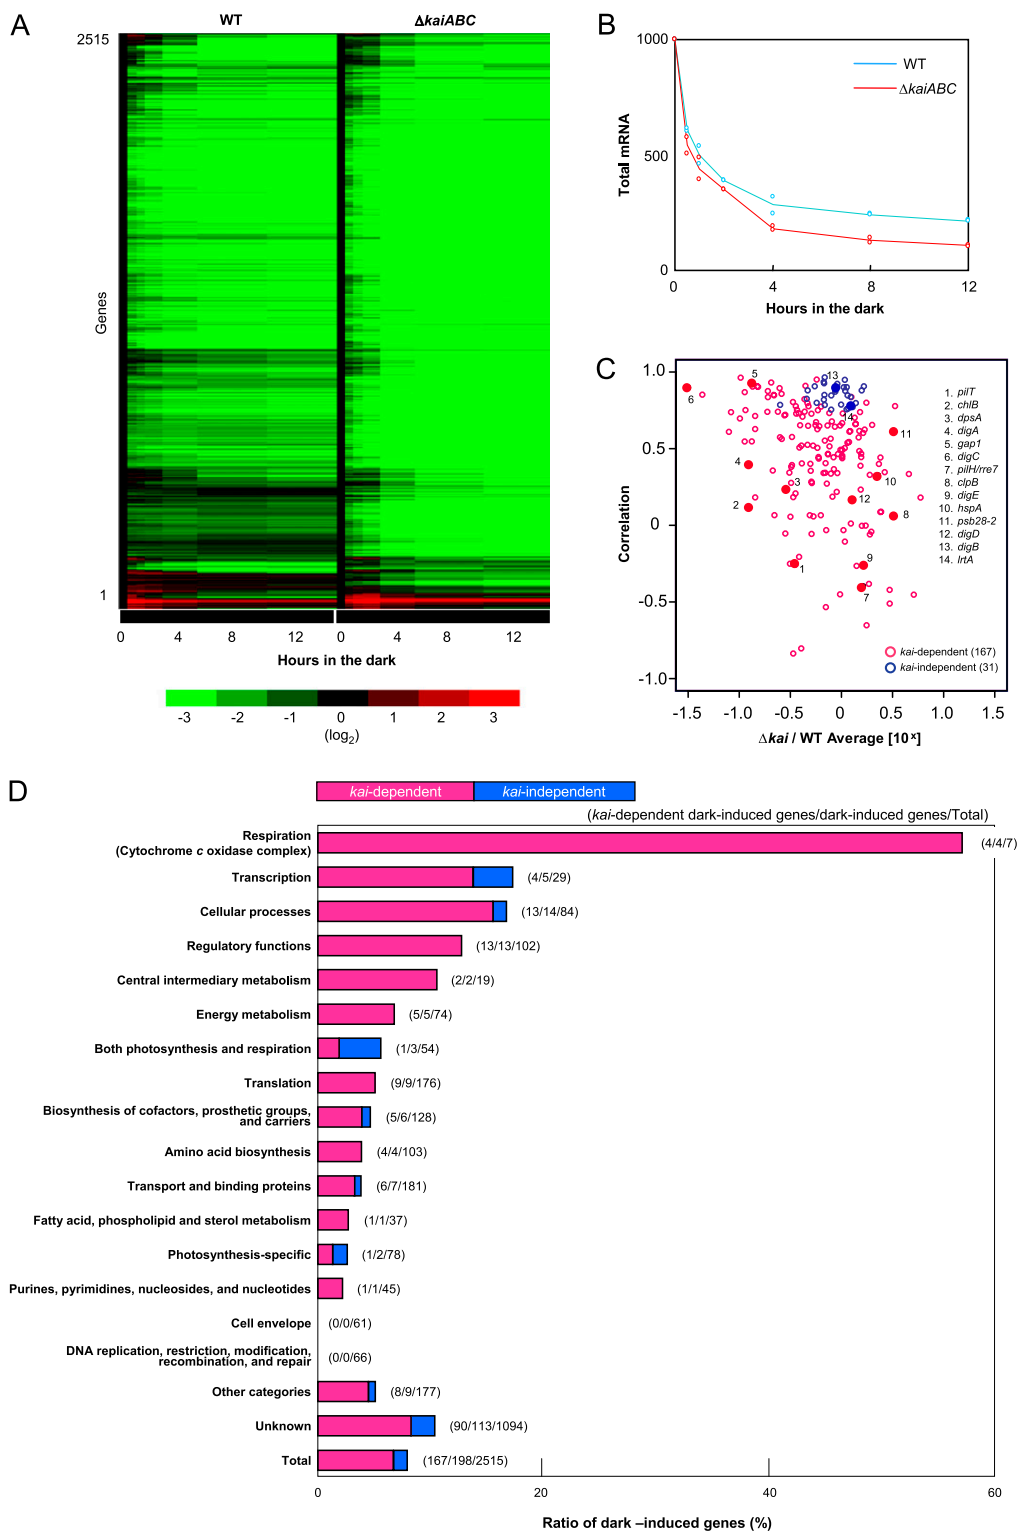

**Fig. S2.** Effect of *kaiABC* nullification on global expression profiles in the dark. (A) Genome-wide expression profiles in the dark conditions in WT and *kaiABC*-null mutant strains. Data were normalized to the value at hour 0 in the dark (= hour 12 in the light). (B) Total mRNA accumulation levels estimated from the sum of the mRNA hybridization signals normalized to the genomic DNA signals under the dark in the WT (blue) and *kaiABC*-null (red) strains. The results of two independent experiments (dots) and their average values (line) are shown for each strain. The maximal total signals at hour 0 in the dark (corresponding to hour 12 in the light) were deemed to be 1,000. (C) Identification of the *kai*-regulated genes among the dark-induced genes. The 198 dark-induced genes were classified into either "*kai*-dependent" or "*kai*-independent" group (*SI Materials and Methods*). The scatter plots indicate the distribution of the correlation value and the expression ratio (mutant/WT) for the 167 *kai*-dependent genes (red) and 31 *kai*-independent genes (blue). The filled circles indicate the 14 dark-induced genes tested in this study. (D) The *kai*-dependent (red) and *kai*-independent (blue) dark-induced genes were classified according to their functional categories. The subpopulation of genes relative to the population of total genes in each category is shown. The numbers of *kai*-dependent dark-induced genes, dark-induced genes, and total genes in each category are shown in parentheses.

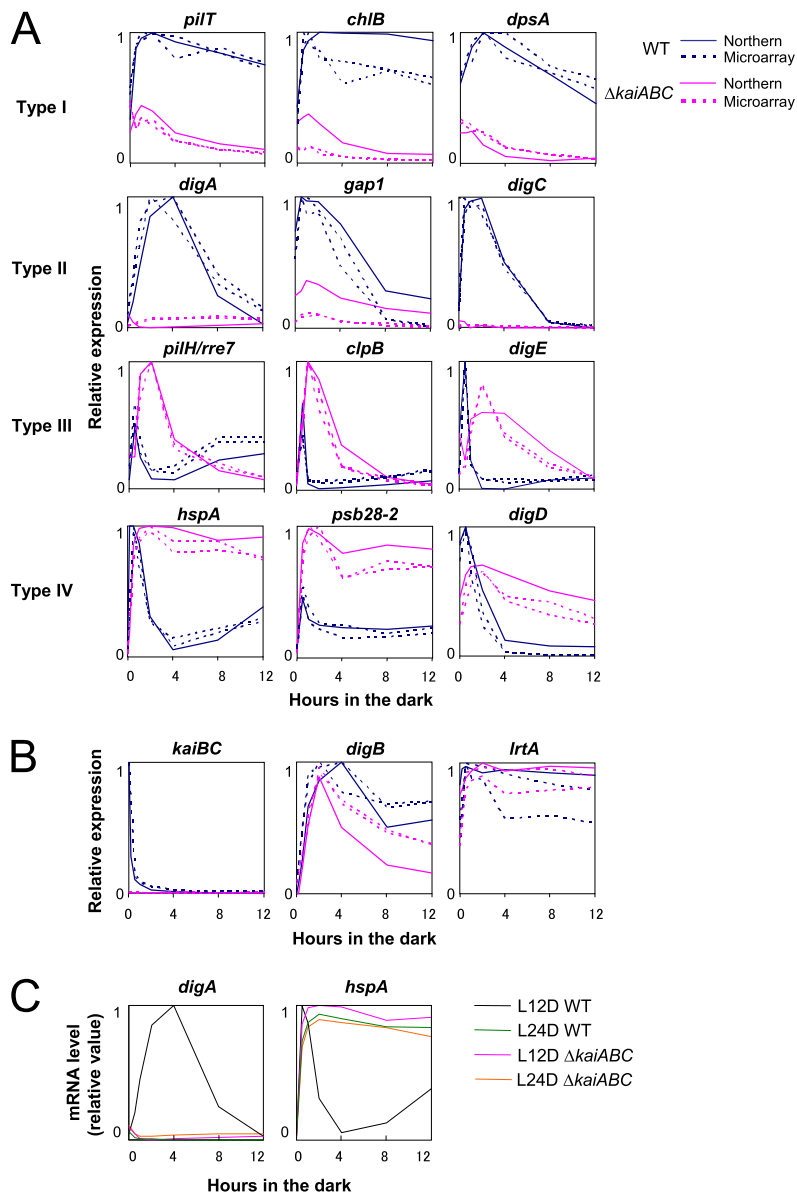

**Fig. S3.** Validation of the microarray analysis and the circadian gating of dark-induced gene expression. (A and B) Validation of the microarray data (dotted lines,  $n = 2$ ) by Northern blotting analysis (solid lines) of the expression profiles of type I–IV genes (A) and the *kaiBC*, *digB*, and *lrtA* genes (B) in the dark. Blue and red lines indicate the expression profiles of the genes in the WT and *kaiABC*-null strains, respectively. Data were normalized to each maximum value in the Northern blot/DNA microarray data for either the WT or the *kaiABC*-null mutant strain. (C) Day-length dependence of dark-induced profiles of the *digA* and *hspA* genes. When the WT and *kaiABC*-null mutant cells were transferred to the dark after 12 h in the light, their expression profiles became essentially similar in the WT (L24D WT; green line) and *kaiABC*-null mutant strains (L24D  $\Delta$ *kaiABC*; orange line), suggesting that the Kai-based clock system gates the timing of dark-induced gene expression during subjective dusk.

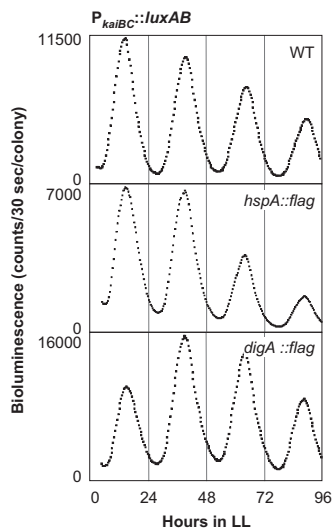

**Fig. S4.** Circadian *kaiBC* promoter activity rhythm monitored with a bioluminescent reporter in the FLAG-tagged strains. Bioluminescence rhythms were monitored under LL conditions after two 12 h/12 h light/dark cycles in the WT, *hspA::flag*, and *digA::flag* strains.

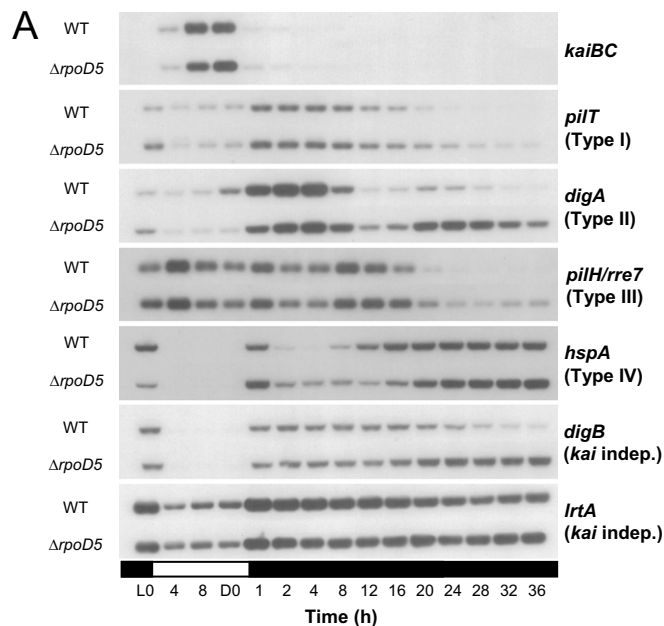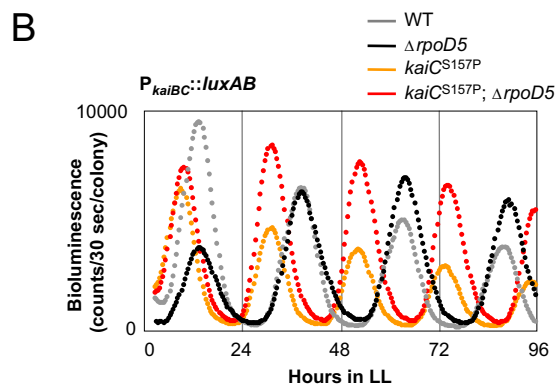

**Fig. S5.** RpoD5 modulates the expression profiles of dark-induced genes under continuous dark conditions. (A) Northern hybridization profiles for the expression of the *kaiBC* operon and representative dark-induced genes are shown in the WT and *rpoD5*-null strains. (B) Circadian *kaiBC* promoter activity rhythms under continuous light (LL) monitored by bioluminescence reporters in the WT, *kaiC*<sup>S157P</sup>, and *rpoD5*-null ( $\Delta rpoD5$ ) strains and the *kaiC*<sup>S157P</sup>;  $\Delta rpoD5$  double mutant strain.

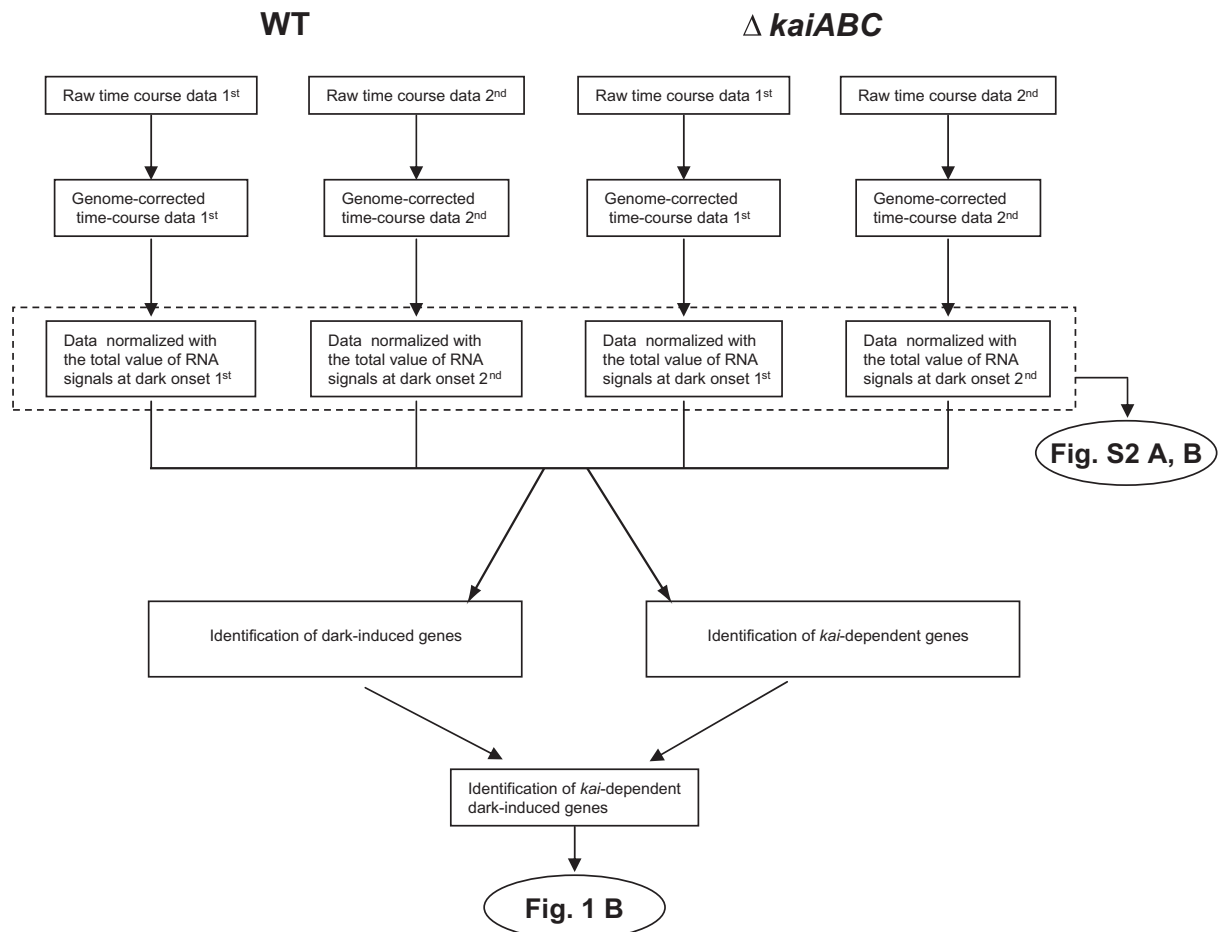

Fig. S6. Schematic diagram of data processing. Details are described in *Materials and Methods* (main text) and *SI Materials and Methods*.

Table S1. *Synechococcus kaiBC*-reporter strains used in this study

| Strain                      | DNA used for transformation                       | Host strain                 | Reporter cassette        | Marker*    | Description                                     | References |
|-----------------------------|---------------------------------------------------|-----------------------------|--------------------------|------------|-------------------------------------------------|------------|
| NUC42                       | —                                                 | —                           | $P_{kaiBC}::luxAB::Cm^r$ | Cm         | Wild-type                                       | 1          |
| NUC43                       | —                                                 | —                           | $P_{kaiBC}::luxAB::Cm^r$ | Cm, Km     | <i>kaiABC</i> -null                             | 1          |
| ILC48                       | pIL468 ( <i>syc2427_c::flag::Km<sup>r</sup></i> ) | NUC42                       | $P_{kaiBC}::luxAB::Cm^r$ | Cm, Km     | <i>digA::flag</i>                               | This study |
| ILC56                       | pIL469 ( <i>syc1704_d::flag::Km<sup>r</sup></i> ) | NUC42                       | $P_{kaiBC}::luxAB::Cm^r$ | Cm, Km     | <i>hspA::flag</i>                               | This study |
| ILC357                      | pIL470 ( $\Delta syc2245_c Km^r$ )                | NUC42                       | $P_{kaiBC}::luxAB::Cm^r$ | Cm, Km     | <i>rpoD5</i> -null                              | This study |
| <i>kaiC<sup>S157P</sup></i> | —                                                 | —                           | $P_{kaiBC}::luxAB::Cm^r$ | Cm, Sp     | Short period (21 h)                             | 2          |
| ILC504                      | pIL470 ( $\Delta syc2245_c Km^r$ )                | <i>kaiC<sup>S157P</sup></i> | $P_{kaiBC}::luxAB::Cm^r$ | Cm, Km, Sp | <i>rpoD5</i> -null; <i>kaiC<sup>S157P</sup></i> | This study |

\*Cm, Km, and Sp represent chloramphenicol-, kanamycin-, and spectinomycin- resistant genes, respectively.

- Nishimura H, et al. (2002) Mutations in KaiA, a clock protein, extend the period of circadian rhythm in the cyanobacterium *Synechococcus elongatus* PCC 7942. *Microbiology* 148: 2903–2909.
- Nakajima M, et al. (2005) Reconstitution of circadian oscillation of cyanobacterial KaiC phosphorylation in vitro. *Science* 308:414–415.

## Other Supporting Information Files

[Dataset S1 \(XLS\)](#)
